# Supplementary material for: Co-design methods as interface for boundary crossing in the design of educational technology: an explorative case study
Source: Research Square preprint supplement (doi:10.21203/rs.3.rs-7818433/v1), 2025-12-10
Supplement: Supplementary file 1 [file 325be287cc344c057538a0d6.docx]

Supplementary Material 2. Guideline for the first part of the interview.

| Topic | Questions |
| --- | --- |
| Information about primary job | - What is your role and your responsibilities at your institution? - How long have you been working at your institution? |
| Previous experience with co-design activities | - Have you been involved in co-design processes before the [name of the project]? If yes, please tell me about your first experience. - How was it and what did it look like? - Did you engage in such processes more often? |
| Experience with co-design activities and the [name of the project] | - What is your role in the [name of the project]? - How do these tasks or their results impact the co-design, or vice versa the co-design impacts your tasks? - What is the most memorable co-design activity you engaged in? This experience can be something specific that occurred one time or something more regular. - Why was it memorable or important? - Did your engagement in the co-design process change over time? - Could you summarise the co-design process that was conducted throughout the project runtime so far? - How did you perceive this co-design process? - What is your overall experience and impression of the co-design process you were involved in? - When thinking about the co-design process: - Did the co-design process help you to gain insights into the complementarity and added values of different practices? - Did the co-design process promote collaboration to deal with the problem, geared towards efficiency and working with each other? - Did the co-design process promote seeing the problem through the eyes of another, both defining and exchanging perspectives? - Did the co-design process promote the development of new knowledge or practices and lead to an end result that could not have been reached without actual collaboration? - What was the impact of you working with the co-design methods? - Impact on the design process? - Impact on your professional practice role and identity? - Would you like to apply some co-design methods in your work or teaching? If yes, which and why? - Is there anything else you would like to share with respect to the co-design process and methods that was not covered in the previous questions? |
| **Source:** Authors’ own work | |
