# Supplementary material for: Co-design methods as interface for boundary crossing in the design of educational technology: an explorative case study
Source: Research Square preprint supplement (doi:10.21203/rs.3.rs-7818433/v1), 2025-12-10
Supplement: Supplementary file 2 [file b62825f25fb81c5c11ec3040.docx]

Supplementary Material 1. Summary of the consent form signed by each participant.

| Title | [Name of the project] |
| --- | --- |
| Promotor | [Name of the institution] |
| Request number | 230672 |
| Principal investigators of the project | [Name of the investigators] |
| Principal investigators of the study | [Name of the investigators] |
| Contact | [Contact email] |
| Participant ID | [Participant ID]] |
| II, [Participant]:   - Have read the information sheet given to me. - Have been able to ask questions about the study. - Have received sufficient information about the study. - Have spoken to: [Researcher] - I understand that my participation is voluntary. - I understand that I can withdraw from the study:   - whenever I want   - without having to give explanations   - without this having any repercussions.   I freely give my agreement to participate in the study. | |

**Source:** Authors’ own work
