# Supplementary material for: Co-design methods as interface for boundary crossing in the design of educational technology: an explorative case study
Source: Research Square preprint supplement (doi:10.21203/rs.3.rs-7818433/v1), 2025-12-10
Supplement: Supplementary file 3 [file d8c60cb373155a8ed70f4531.docx]

Supplementary Material 5. Coded passages from the interview.

| **Co-design** | **Passage** |
| --- | --- |
| **Identification** | |
| Co-design | P06 “I think. Maybe it it. I'm not sure if it wasn't if it was very efficient. I think it wasn't very efficient. But, um, it was, um, important to do this because we came all from other countries and we have first to, um, to have an idea from each other. So I think that was very important to do this. It wasn't efficient but efficient in a, in a, in a time way, but in a in a working way. I think it was, it was efficient. Yes. And okay, at least, um. And, um. Yes”  P05 “Because and sometimes you have a really you have many, many thoughts inside, but you don't know how to organise them. So it helps to, to organise all my perspectives and all my insights in a systematic way. And that I suppose I help the co designers to, to gain these insights and to to use them to design the innovation.”  P06 “good to see how these, um, um, different people from other countries, um, have something in common and something not in common”  P02 “I could experience from that Workshops that sometimes you've seen that your side, you know is the only one and you can see that there are many sides of the same phenomenon”  P05 “innovation actions helps us to identify the different perspectives” |
| Innovation Canvases | P05 “I think that Innovation Canvases is for me is the most important because it helps you to have a wider view of the problem and the different stakeholders that are involved” |
| Value Proposition Canvas | P03 “But at the same time, it was helpful to see how different countries could manage and use the different solutions, for example.”  P05 “Yes. Um, I remember when we were in Graz. Um. Uh, yeah, um. Our internships work very different here in Spain than in Germany. And for example, we have the lean teacher here in Spain and in Germany, they don't have this bigger. They don't have this role and this person who takes care of the students. So I it helps me to identify that maybe. The innovation or the lean teacher who is involved here in Spain is not in Germany. And maybe the mobile application have to consider this different, this difference between the different countries.” |
| Personas and Scenarios | P03 “Sometimes during this activity I could understand or I could see that we have all the same problems, but we are dealing in a different way sometimes where something really different.”  P05 “And did did the co-design process. So the process helped you to to give this this point of view or to show your perspective? #05: [00:10:21] Yes. Because, for example, if you use the persona, you can put on someone's shoes when it's using the, the tool, the innovation tool. So, um, and also using the user journey and blah blah, blah. And you can try to understand how the user, how the real user can interact with the innovation. And also these innovation tools for me helped me a lot to organise myself and to organise the different ideas that could that could help to improve the innovation tool and that could make a successful innovation and okay, useful innovation for our institution.”  P04 “I think the frustration and pain points was a little bit different in different countries and. And also the context in which the user will be used. This application also was a little bit different.” |
| User Journey | P05 “And did did the co-design process. So the process helped you to to give this this point of view or to show your perspective? #05: [00:10:21] Yes. Because, for example, if you use the persona, you can put on someone's shoes when it's using the, the tool, the innovation tool. So, um, and also using the user journey and blah blah, blah. And you can try to understand how the user, how the real user can interact with the innovation. And also these innovation tools for me helped me a lot to organise myself and to organise the different ideas that could that could help to improve the innovation tool and that could make a successful innovation and okay, useful innovation for our institution.” |
| Coordination | |
| Co-design | P02 “but remember that [Name of participant] was saying sometimes that another universities, they don't have this kind of follow up of the students like we have in [Name of the institution]. And she said that this kind of difference, it will be very complicated. It will be complicated if we have to use learning toolbox for all of us. So that was something that mean we thought that, okay, that's that's true”  P01 “And I think that the co-design process helps us to focus on the problem, and that was really important in the beginning. We didn't know how to advance in how to introduce mobile technology in practice placement, and the co-design process helps us to to have a focus and to and and at the end or during the co-design process, the partners start to understand what were the focus of the project.”  P01 “And after this workshops and you can see the meetings, all the partners are very active and they want to express their opinions and they want to lead one part of the project”  P01 “And I think that the co-design process helps us to focus on the problem, and that was really important in the beginning. We didn't know how to advance in how to introduce mobile technology in practice placement, and the co-design process helps us to to have a focus and to and and at the end or during the co-design process, the partners start to understand what were the focus of the project”  P05 “it's a very powerful tool that facilitates this collaboration among different team members with different perspectives and with different points of view and with different realities, you know, because every country and every institution have a really different scenario and different reality.”  P05 “As I told you, um, it helps to, you know, to collaborate among the different, um, members involved in, in the co-design process. So, um, try. It helps to organise the different needs and to homogenise this different perspectives of the different members.”  P05 “So also the great was that in each of task was some kind of leader who explain everything and, um, and on each step, everything, everything was clear. And also the good was that we could give the feedback. So we finish our work and we could give the feedback on each stage. So it was also good because we could see overall work and think about the feedback of this work that we agree or something could be better”  P01 “The during the process we receive inputs or insights about all the partners and a lot of ideas. Maybe we have a lot of ideas and insights and we during the process the work package leader in work package three they must to distillate a lot of ideas and concrete a the different ideas and put the focus on the three topics. Okay. Yes. Yes. Yes. I can I find I found a that we gain insights during the co-design process.”  P04 “we was able to work in groups with the different experience. So it was good because in our experience we meet with different problems.” |
| Innovation Canvases | P05 “the innovation actions helps us to identify the different perspectives, helps us to homogenise the different points of view and helps us to have a better knowledge and to develop new knowledge, which maybe, um, without doing this, actions never appear, you know, never occur.” |
| Value Proposition Inovation Canvas | P01 “And the result was additionally the the results about the value proposition canvas. And regarding to the coordination, these methods help us to try to coordinate the next phases of the project.”  P02 “I will say that workshops were really useful because I mean they were very good coordinator and it was really I mean we in the end of the day, we have the information [we] wanted to have. So that's good. That's efficiency”  P05 “Think that value proposition canvas helps us to coordinate the, the, the collaboration between the different partners. And for me, it was the most important innovation action and that helped us to coordinate everything. Um, and also the different workshops when we were developing personas, user journeys and whatever. They're really useful to coordinate. Um. To coordinate us and to collaborate, collaborate with the different team members and the different institutions.”  P02 “Yes, I'm completely agree that this kind of design, it's mean. You have a lot of information from different perspectives, as I said. But my my. I will say that the problem with that design is that you have to have a very good leaders for for that methodology. If you don't have very good leaders, it's really confusing. And, um, and it's not and you have a very good, I mean, you have to be very strict with the different, you know, phases and very good at the time”  P07 “And for the other there was a five also. Yeah. There. I remember that. Um, um there I would again mention the onboarding systems in different practice places placements and the reflective practice that we in our, for example, in our practice placements are not doing as much as like in Spain. You are doing it at [Name of the institution]. This is an example.”  P01 “I think that all the partners was were really involved and and they want to participate very hard. And the result was additionally the the results about the value proposition canvas. And regarding to the coordination, these methods help us to try to coordinate the next phases of the project. And for these reasons I have put a five number five maybe the [Name of the project] the innovation canvas is three. And we got about our acknowledgement about the University Innovation Campus maybe is more difficult to understand the different concepts.”  P05 “The individual canvas. So it helps to divide tasks. Um. And also to, you know, to to put all the ideas in a systematic way and all the concepts that we have in mind. Um, also the value proposition canvas.”  P05 “the innovation actions helps us to identify the different perspectives, helps us to homogenise the different points of view and helps us to have a better knowledge and to develop new knowledge, which maybe, um, without doing this, actions never appear, you know, never occur.” |
| Personas and Scenarios | P01 “For me, the workshops was were very nice and see how all the partners were working together in Miro Board and putting into the Miro Board different ideas and very nice ideas and the opportunity that all the partners has to change to, to, to share the the the first impressions about digitalisation in practice placements. For me, it was the most beautiful and the most impact on myself and additionally see how all the partners work together and with the main objectives and they want to share these objectives. And this this is really grateful for me as a coordinator. Okay. Yeah.”  P04 “Because we find we we find a few points, which was which was specific for all of the countries and and which and the problems which probably will cope. All of the clinical mentors. Okay. Students.”  P01 “Regarding to the personas user journey and the mockups, one example is how to about a facilitating task devision. Task division was in the moment that we start to create the the reflective practice mini guides and the feedback mini guides.”  P05 “Think that value proposition canvas helps us to coordinate the, the, the collaboration between the different partners. And for me, it was the most important innovation action and that helped us to coordinate everything. Um, and also the different workshops when we were developing personas, user journeys and whatever. They're really useful to coordinate. Um. To coordinate us and to collaborate, collaborate with the different team members and the different institutions.” |
| User Journey | P01 “For me, the workshops was were very nice and see how all the partners were working together in Miro Board and putting into the Miro Board different ideas and very nice ideas and the opportunity that all the partners has to change to, to, to share the the the first impressions about digitalisation in practice placements. For me, it was the most beautiful and the most impact on myself and additionally see how all the partners work together and with the main objectives and they want to share these objectives. And this this is really grateful for me as a coordinator. Okay. Yeah.”  P01 “Regarding to the personas user journey and the mockups, one example is how to about a facilitating task devision. Task division was in the moment that we start to create the the reflective practice mini guides and the feedback mini guides.”  P05 “Think that value proposition canvas helps us to coordinate the, the, the collaboration between the different partners. And for me, it was the most important innovation action and that helped us to coordinate everything. Um, and also the different workshops when we were developing personas, user journeys and whatever. They're really useful to coordinate. Um. To coordinate us and to collaborate, collaborate with the different team members and the different institutions.” |
| Mock-ups | P01 “Regarding to the personas user journey and the mockups, one example is how to about a facilitating task devision. Task division was in the moment that we start to create the the reflective practice mini guides and the feedback mini guides.”  P01 “For me, the workshops was were very nice and see how all the partners were working together in Miro Board and putting into the Miro Board different ideas and very nice ideas and the opportunity that all the partners has to change to, to, to share the the the first impressions about digitalisation in practice placements. For me, it was the most beautiful and the most impact on myself and additionally see how all the partners work together and with the main objectives and they want to share these objectives. And this this is really grateful for me as a coordinator. Okay. Yeah.” |
| Reflection | |
| Co-design | P04 “Uh, so I mentioned that it was great to share different ideas with different people, confront the perspectives. Um, but also for me, the great was that on each step everything was explaining. So everything was clear”  P05 “it helps me to put in someone else's shoes and it helps me to try to give a wider perspective of what I was asked in that in every co-design process. I don't know if I'm answering your question.”  P05 “It helped me to organise my different ideas and my different concepts in, as I told you, in a systematic way.”  P02 “Well, I'm not sure if you can say that you can bring new knowledge. I will say that you can bring out acknowledged that was hiding. I will say that.”  P04 “my impact was that I could share my perspective as a young teacher and also young nurse, which is which work in hospital and need to deal with some problems not only with students but also the with the patients and also communication”  P04 “I now I know I learn a new method of co-design, but for the project it was very good because, because we meet a lot of perspectives and also a lot of ideas of different people and we could confront this idea. So I think um, the result for the, for this co-designing will be that we got some kind of whole perspective of different specialists and so.”  P03 “I think that this co-designing process was organised, has been organised in the way that went. It went smoothly. And for me personally, it is also kind of a signal that it can be done in different activities at the same way, like um, using different tools, different methods, um, can help to understand different perspectives and different levels of the material which we want to use because yes, we can, we can discuss clinical placements, which is very complex issue, but actually using different methods in Co-designing process helped us to narrow the topic in order to build the, the, the, the application.”  P04 “I don't know so many ideas how to teach and also how to cope with some problems. So for me, it was some kind of promoting a new knowledge and practices and. And but also it was good for teachers with more experience because in different countries we got different solutions, different perspective. Some countries need to cope with some problems and other not. So it was good to develop this new knowledge and practices.”  P04 “I think in nursing we meet with different problems and the physician meet with different problems and um, and maybe this is some kind of medical faculty, but, but the way of teaching should be similar, but sometime, sometime it's not. So it was, it was good to see the problem from that different perspective from the different faculties. And because sometimes I'm not expect that the physicians got got similar problems like nurses and only see the my perspective of a nurse.”  P04 “the huge impact was about this collaboration with another professional artist because like I said, I see only my perspective as a nurse and the process could give me the perspective. Also another professional artist and I see that they also have some kind of problems that they need to cope with.”  P01 “I was thinking before [the] start the co-design process that the most important issues, to try to introduce mobile technology in practice placement [for,] was the information and communication. Okay. And on my mind on boarding. Was important, but using co-design process, I have changed my my things. And and now onboarding is one of the most important issues to try to introduce mobile technology. And this is "gracias a"... thanks to that. Yeah.”  P04 “We was able to work in groups with the different experience. So it was good because in our experience we meet with different problems. So it was helpful to deal with problems. So for, for example, me as a young teacher, I'm not meet so many problems in my career. So, uh, so I, I'm not so prepared to cope with, with them. And it was great that teacher with more experience shared with me the ideas how to cope with this problem and how to find the solution in, in some kind of way that I'm not that I don't know.”  P04 “In my job only with nurses and on in this project I also, um, meet with the perspective of the physicians, of the different academic teachers and, and also people with different experience and with different stage of the, of the work. So it's something new for me because I'm a young nurse and young teacher and, um, and for example, in this project I saw the first time, uh, some kind of aspects of teaching. And because the people with different experience share with me something that they already done in, in their career. So for me it's some kind of added value for, for, for this in this project.”  P05 “there was once that we were talking about the learning goals widget and. I think that there was the lemon cookie lemon method. I think it was for reflection or for reflective practice, which I didn't know. And someone started talking about it. I think it was [name of participants] and. Yeah. Uh, maybe the way to reflect as I knew it before, it was not the best one. So there are other perspectives of other partners and of other ways of doing that can be better or it can be different. And yeah, we try to introduce these different perspectives in the different. Uh, a scenarios that we were working.”  P02 “You can see it from different mirada's how they say how they say that, you know, perspective. So perspective. So it was really complimentary to see what they're understand from the learning process, from the clinical perspective as a nurses and the nursing learning process from the academic area, from the university” |
| Innovation Canvases | P03 “I think that the good example of this multi-dimensional issues and to see different, very different perspectives is working with Canvas, but also working on uh, um, uh, on archetypes when everybody actually could add, um, his or her own perspective, vision, uh, experience. And this adding values were respected by other partners. So there is no, there is no neglected person or idea, but all is counted.”  P07 “I think that like for the value proposition, we got to know our different problems but not to solve them. It was not that efficient to, to have a solution for that. And during the persona and the user journey, I think ah, the, during the shared four d, I think it was a step more in this direction that we try to summarize our problems and saw the main problems so that we had kind of had to decide together which were the main parts. And during the user journey I think there was the most discussion about the differences between the practice placement and to um, summarize that or to yeah, to, to stick to one problem or two problems that we saw within our students and not put everything into it. Yeah.”  P04 “I think that like for the value proposition, we got to know our different problems but not to solve them. It was not that efficient to, to have a solution for that. And during the persona and the user journey, I think ah, the, during the shared [name of the project] IC I think it was a step more in this direction that we try to summarize our problems and saw the main problems so that we had kind of had to decide together which were the main parts. And during the user journey I think there was the most discussion about the differences between the practice placement and to um, summarize that or to yeah, to, to stick to one problem or two problems that we saw within our students and not put everything into it. Yeah.”  P05 “I think that all the innovation methods and all the innovation actions, um, help us to collaborate and to communicate because we are putting in common all our ideas and new ideas came up, come up can come up. Um, so for me. All the different actions and facilitates coordination and promotes collaboration”  P05 “I participate in the innovation canvases and also the different innovation tools that you have used, the personas and scenarios. And I try to give the point of view of um, of the university or sorry, of the hospital institution where I'm working.”  P05 “I've tried to give my. Perspective.From, from the point of view of the hospital where the students come to do their internships because, you know, in the internships that are different actors involved, there is the university part and there is the hospital part. Um, and the students of course, and the stakeholders. But what I try to do is to give the point of view of the hospital who is hosting the students” |
| Value Proposition Canvas | P02 “And that was probably the best thing in that workshop that, for example, I was academic, I am academic, so my perspective was from the academic environment so I could explain what was my experience and my clinical experience in that area and what, um, what is my perception of the things that are happening from the academic area, from the clinic to the clinical hospitals, institutions. But in that workshop there were people from the clinical area, so there were nurses that they were working every day with patients. And so that was very good to have this kind of connection with them”  P03 “discussion regarding reflection and how to use it and what does it mean actually, how different perspective for reflective practitioner were discussed during this workshops. Mhm. Yes. So that was something new. Researcher: [00:42:05] Okay. So you mean that you reflected and using the value proposition canvas and you got to something new some, some new practice or…#03: [00:42:15] Some.New perspective, some new aspects of clinical education organization. Mhm.”  P02 “well, the thing that I remember from the workshop in Graz is that because we were very different people from different, um, so all of us, almost all of us, we knew what we were talking about, the learning environment in nursing practice, clinical practice. So but our background was really different. So that was the point. And that was probably the best thing in that workshop that, for example, I was academic, I am academic, so my perspective was from the academic environment so I could explain what was my experience and my clinical experience in that area and what, um, what is my perception of the things that are happening from the academic area, from the clinic to the clinical hospitals, institutions. But in that workshop there were people from the clinical area, so there were nurses that they were working every day with patients. And so that was very good to have this kind of connection with them because that was really useful to see what is, um, um. Like, you know, like the the phenomena. You can see it from different mirada's how they say how they say that, you know, perspective. So perspective. So it was really complimentary to see what they're understand from the learning process, from the clinical perspective as a nurses and the nursing learning process from the academic area, from the university. So it was a really good experience. Yeah.”  P03 “These activities were more or less interactive, not just the activity task, which you need to do just connecting by internet, but, but um, being engaged in discussion. Hearing different perspective. Reflecting and answering questions. So these activities are really helped in reflection because this is always when, when you discuss something with, with people, you do not concentrate only with what is written on the paper or. On the Internet. Yes.”  P04 “I think that like for the value proposition, we got to know our different problems but not to solve them. It was not that efficient to, to have a solution for that. And during the persona and the user journey, I think ah, the, during the shared [name of the project] IC I think it was a step more in this direction that we try to summarize our problems and saw the main problems so that we had kind of had to decide together which were the main parts. And during the user journey I think there was the most discussion about the differences between the practice placement and to um, summarize that or to yeah, to, to stick to one problem or two problems that we saw within our students and not put everything into it. Yeah.”  P02 “That was it was the workshop we spent all day just trying to, you know, to to. Uh, to give an information about what was, you know, our role as academic nurses and things like that. So it was a very, a whole day intensive day, just trying to put our, um, thoughts in, in, in the, in this canvas method. So that was because I was really engaged in that in that day. Yeah.”  P02 “we were discussing with [Name] some of the things that we bring out in in, in Graz about, you know, the perspective that, for example, um, [Name] or [Name], they have, you know, uh, in the perspective of the clinical practice. And we said we didn't know that. I mean that, that they, they, they give some information that we didn't know and or we knew in a, some way. And they as a clinical persons from the clinical institution, they were having a perspective that we we almost suspect, but we didn't know. So it was nice to have this information from them”  P02 “But remember that [Name] was saying sometimes that another universities, they don't have this kind of follow up of the students like we have in [Institution]. And she said that this kind of difference, it will be very complicated. It will be complicated if we have to use learning toolbox for all of us. So that was something that mean we thought that, okay, that's that's true”  P02 “Principally because the European project, I mean I have been talking about the, the [Name] and [Name] because they work in that same area that we work and it's easy for me to compare and to have this information. But in this European project we have people from another countries and they don't work as we are. So, um, that that was. That probably is the the more rich part of the project. Now to see, for example, Germany, they were preparing this learning toolbox for medicine students so that not the same nursing students is another different but discipline. So the perspective that they have is different, the ones that we have for nursing students. So it's very nice to have this kind of information and and exchange these perspectives and mutual meaning. Yeah, I will say.”  P02 “That probably is the the more rich part of the project. Now to see, for example, Germany, they were preparing this learning toolbox for medicine students so that not the same nursing students is another different but discipline. So the perspective that they have is different, the ones that we have for nursing students. So it's very nice to have this kind of information and and exchange these perspectives and mutual meaning.”  P05 “The value proposition canvas is the workshop that we did in Graz or personas, user journeys, workshops or whatever. And every time that every partner say something, I could realize that I was missing something”  P02 “They were doing examples and about medicine students and how they were there and how they do the clinical practice and how they. So I realized there in Graz that we were talking about different disciplines that they don't work at the same. For example, in nursing students, they have a lot of clinical practice hours, um, but not in medicine. They don't have so much hours. So even how they have this kind of role in the clinical practice is not the same as a nurses. So it was very nice because we were trying to have the same learning toolbox for nursing students and medicine students, and that was in the in the Proposition Canvas day that we spent all day. It was there where I realized that we were talking about differences between countries and difference between disciplines.”  P02 “Yeah, that's I think that the the answer that did in the the before know was for example I can ask one thing that we didn't realize and it's important to take into account it is hospitals and institutions. They have a lot of students from another academic institutions and sometimes we don't have this information and we don't realize that the way that we work at [Name of the institution] is not the work as I mean the work in [Name of the institution] or another university. So clinical [Name] and [Name], they received all these students from different academic institutions and they have to deal with that. And sometimes we in our perspective, we don't take into account that they have to deal with another institutions that they don't work as we are.” |
| Personas and Scenarios | P08 “I think there we, um, uh, think about which role we have, which role the, the [other] countries have, and then we have to decide which kind of role we want to create there. Okay. And I think that was very collaborative.”  P03 “I think that the good example of this multi-dimensional issues and to see different, very different perspectives is working with Canvas, but also working on uh, um, uh, on archetypes when everybody actually could add, um, his or her own perspective, vision, uh, experience. And this adding values were respected by other partners. So there is no, there is no neglected person or idea, but all is counted.”  P07 “I remember that we were talking that I remember discussing about the stakeholder, the different stakeholder rules and how this had an effect in my institution and for the persona. Um, it was um, to, to um, learn the perspective of other student in other, um, practice placements and as well with the user journey.”  P04 “So in in the in different countries, different users, so different persona got different problems. And we need to create one one of example, one one example which will be good agreement for all all of the countries and which which will. Take all of the problems together in one case.”  P06 “The personas I think we talk about in the in these small groups, which kind of roles in the special um, clinic or in the, in the work field we have. And then we have to decided which part of these, um, roles we do in this persona. So I think we have to reflect what are in what. Uh, work the, um, these people and, uh. Yeah, and we have to do all this together. And so, yeah, I think that was the very good, very good.”  P04 “In persona, for example, we got different, different perspectives. So, uh, different people share the ideas how to, how to this persona should looks like and we need to make some kind of agreement for, for, for this. And the similar was with the user journey because we need to find some kind of a one solution, one agreement about about this.”  P03 “These activities were more or less interactive, not just the activity task, which you need to do just connecting by internet, but, but um, being engaged in discussion. Hearing different perspective. Reflecting and answering questions. So these activities are really helped in reflection because this is always when, when you discuss something with, with people, you do not concentrate only with what is written on the paper or. On the Internet. Yes.”  P05 “I think that all the innovation methods and all the innovation actions, um, help us to collaborate and to communicate because we are putting in common all our ideas and new ideas came up, come up can come up. Um, so for me. All the different actions and facilitates coordination and promotes collaboration”  P03 “Because here it was interactive and we could really discuss different perspectives. Even it was online, but still people were engaged.”  P05 “I participate in the innovation canvases and also the different innovation tools that you have used, the personas and scenarios. And I try to give the point of view of um, of the university or sorry, of the hospital institution where I'm working.”  P06 “Because they they said to or we said to each other how is the special persona on the organization. How how is the student, how is the the nurse, how is the teacher? And I think so you have more idea how it works in the other country. And now and then I, I can compare it to my country and my organization.”  P05 “I think that we were trying to design the persona and I was participating with Lublin, which they they are. They also have the different internships of the different students at hospital. And I think that [Name]'s, I don't remember actually what was exactly what was, but she said something that I said, Oh, that's true”  P05 “I've tried to give my. Perspective.From, from the point of view of the hospital where the students come to do their internships because, you know, in the internships that are different actors involved, there is the university part and there is the hospital part. Um, and the students of course, and the stakeholders. But what I try to do is to give the point of view of the hospital who is hosting the students”  P05 “If you use the persona, you can put on someone's shoes when it's using the, the tool, the innovation tool”  P04 “this was the workshop about the scenarios because on this workshop we was in some kind of mixed groups and this was a great experience because in this mixed groups was specialists in different areas. And also we could share our perspectives and also each of this person look on the problem in different ways. So for me, it was a great experience to see how, for example, um, only theoretical teachers see the perspective and also how the teacher of practice see the perspective.”  P05 “The value proposition canvas is the workshop that we did in Graz or personas, user journeys, workshops or whatever. And every time that every partner say something, I could realize that I was missing something” |
| User Journey | P03 “I think that the good example of this multi-dimensional issues and to see different, very different perspectives is working with Canvas, but also working on uh, um, uh, on archetypes when everybody actually could add, um, his or her own perspective, vision, uh, experience. And this adding values were respected by other partners. So there is no, there is no neglected person or idea, but all is counted.”  P04 “in the user journey, we could find the we could find the different perspectives of, of the journey in this user journey in different countries and also how they will implement the application and how what kind of problems they could meet. So we could, we could identify this this problems and also try to find the one solution for for differ  ent needs.”  P03 “I don't remember the exact discussion. For example in the user journey about, um, when we were asked to give some different perspectives regarding um, um, yeah. The, the, the user journey. Yes. When it comes to, to, to clinical education, um, it was well coordinated, uh, so everybody could share perspective. And then finally, um, through the discussion, we, we found an answer which would be, uh, okay. Written down. Yeah. So it was in a time I don't, I don't know how to, how to clearly express, but that's.”  P07 “I remember that we were talking that I remember discussing about the stakeholder, the different stakeholder rules and how this had an effect in my institution and for the persona. Um, it was um, to, to um, learn the perspective of other student in other, um, practice placements and as well with the user journey.”  P04 “In persona, for example, we got different, different perspectives. So, uh, different people share the ideas how to, how to this persona should looks like and we need to make some kind of agreement for, for, for this. And the similar was with the user journey because we need to find some kind of a one solution, one agreement about about this.”  P03 “These activities were more or less interactive, not just the activity task, which you need to do just connecting by internet, but, but um, being engaged in discussion. Hearing different perspective. Reflecting and answering questions. So these activities are really helped in reflection because this is always when, when you discuss something with, with people, you do not concentrate only with what is written on the paper or. On the Internet. Yes.”  P04 “I think that like for the value proposition, we got to know our different problems but not to solve them. It was not that efficient to, to have a solution for that. And during the persona and the user journey, I think ah, the, during the shared [name of the project] IC I think it was a step more in this direction that we try to summarize our problems and saw the main problems so that we had kind of had to decide together which were the main parts. And during the user journey I think there was the most discussion about the differences between the practice placement and to um, summarise that or to yeah, to, to stick to one problem or two problems that we saw within our students and not put everything into it. Yeah.”  P03 “I think that this is the issue of of again, meeting discussion having time for sharing perspective. Um, and yes. So even though the personal user journey were online meetings and still we had a time to, to, um, reflect and to share our ideas. So they were still online meetings. But considering the, the, the grass workshops, we really could, um. Influence each other and perspectives.”  P04 “So in the user journey, we need to we need to think about we need to think about the perspective of the teacher or the perspective of the students. And also we need to think about this perspective and from the experience with different people from different countries. And we need to find the one solution. And in the personal, um, we also reflect but think it was not so maybe it was not so deep as, as the as in the user journey.”  P05 “I think that all the innovation methods and all the innovation actions, um, help us to collaborate and to communicate because we are putting in common all our ideas and new ideas came up, come up can come up. Um, so for me. All the different actions and facilitates coordination and promotes collaboration”  P05 “The value proposition canvas is the workshop that we did in Graz or personas, user journeys, workshops or whatever. And every time that every partner say something, I could realize that I was missing something” |
| Transformation | |
| Co-design | P05 “new ideas, fresh ideas come up using these collaborative tools. Um, so if we didn't use these approaches, maybe we couldn't design the different innovations.”  P05 “This collaborative approach leads to the development of solutions to the different challenges that may have the different institutions”  P04 “I could find some kind of problems which we could meet in the in the process, in the, in the process of implementing also, but also maybe some kind of I could share my some kind of ideas of solutions.” |
| Source: Authors’ own work | |
