# Supplementary material for: Co-design methods as interface for boundary crossing in the design of educational technology: an explorative case study
Source: Research Square preprint supplement (doi:10.21203/rs.3.rs-7818433/v1), 2025-12-10
Supplement: Supplementary file 4 [file ee886eb8cd2de563d30ad39e.docx]

Supplementary Material 4. Questions for each of the design methods related to the boundary crossing learning processes.

| Topic | Questions |
| --- | --- |
| Recall the function of the design method | Do you have a clear idea of the function of the design artefact in the design process of the mobile technology in [Name of the project]? |
| Engagement with co-design methods | How much did you engage in the co-creation of the design method: e.g. taking part in discussions or editing the design artefact in a workshop or after a workshop? |
| Support to Identification | Did the design artefact help you to gain insights into the complementarity and added values of different practices: e.g., understanding own and other expertise, stake and perspective? Please, explain and give examples. |
| Support to Coordination | Did the design artefact promote collaboration to deal with the problem, geared towards efficiency and working along each other: e.g., facilitating task division, communication, making agreements and developing resp. tools? Please, explain and give examples. |
| Support to *Reflection* | Did the design artefact promote learning to see the problem through the eyes of another, both defining and exchanging perspectives: e.g., mutual meaning making and connecting different perspectives and expertise? Please, explain and give examples. |
| Support to Transformation | Did the design artefact promote the development of new knowledge/ practices and lead to an end result that could not have been reached without actual collaboration: e.g., integration of perspectives and co-creation of innovative and sustainable solutions? Please, explain and give examples. |
| **Source:** Authors’ own work | |
